# Supplementary material for: Identification of novel driver mutations of the discoidin domain receptor 2 (DDR2) gene in squamous cell lung cancer of Chinese patients
Source: BMC Cancer. 2014 May 24;14:369. doi: 10.1186/1471-2407-14-369 (PMC4039546; doi:10.1186/1471-2407-14-369)
Supplement: Additional file 1: Table S1 — Clinicopathological characteristics and DDR2 mutations of 86 patient samples of lung SCC. [file 1471-2407-14-369-S1.xls]

## Sheet: book1
Number	Gender	Age(years)	TNM Stage	Tumor size（cm)	Lymph node metastasis	pleura	Cancer embolus	Mutation
201101117	M	62	ⅠB（T2a，N0，cM0）	3	N	N	N
201101256	M	72	ⅡA（cT2b，N0，Mx）	5	N	Y	N	intron 13
201104256	F	64	ⅡA（T2b，No，cMo）	3	N	Y	N
201104994	M	64	ⅢA（T2a，N2，cMo）	4	Y	Y	Y
201105851	M	69	ⅠB（T2a，No，cMo）	4	N	N	N	intron 13
201106045	M	58	ⅠB（T2a，No，cMo）	3	N	N	N	intron 13
201106106	M	69	ⅠA（T1b，No，cMo）	2	N	N	Y	intron 13
201106460	M	55	ⅠB（T2a，No，cMo）	3	N	N	N	intron 13
201106560	M	71	ⅡB（pT3，No，Mx）	8	N	Y	N	intron 13
201000199	M	74	ⅢA（pT1，N2，M0）	2	Y	Y	Y
201000426	M	55	ⅢA（T1，N2，Mx）	3	Y	N	Y
201000806	M	63	ⅢA（T1，N2，Mx）	2	Y	N	N
201001735	M	64	ⅠB（T2，No，Mx）	4	N	N	N	exon 5 L100L
201002489	M	61	ⅡB（T2，N1，Mx）	6	Y	Y	N
201002649	M	56	ⅢA（T3，N1，Mx）	10	Y	N	N	intron 13
201002650	M	63	ⅡB（T3，No，Mx）	4	N	Y	Y
201003043	M	72	Ⅱ（T2，No，Mx）	5	N	N	N	intron 13
201003775	M	65	ⅢA（T2，N2，Mx）	6	Y	N	Y
201004236	M	61	ⅡB（T2，N1，Mx）	3	Y	N	N
201004512	M	60	ⅢA（pT2a，N2，cM0）	4	Y	Y	Y
201004559	M	52	ⅡB（T2 N1 Mx）	3	Y	Y	Y	exon 5 H136H
201004579	M	39	ⅢA（T2，N2，Mx）	5	Y	Y	Y
201005479	M	57	ⅡB（T2，N1，Mx）	6	Y	Y	N	intron 13
201005535	M	56	ⅠB（T2a，No，Mx）	5	N	N	N	exon 15 T681I
201006514	M	78	IA（pT2b，No，cMo）	2.5	N	N	N	intron 13
201006971	M	56	ⅠB（T2a，No，Mx）	3.5	N	N	N
201008451	M	51	ⅢA（pT3，N1，Mx）	9	Y	N	Y	exon 13 G531V
201010098	M	56	ⅢA（pT4，N1，Mx）	3	Y	N	Y	exon 5 H136H
201010604	M	61	ⅠB（T2a，No，Mx）	3.5	N	N	N	intron 13
201010663	M	66	ⅠB（pT2a，No，cMo）	4	N	N	N
201011077	M	62	ⅡA（T2b，No，Mx）	6	N	N	N	intron 13
201011536	M	75	ⅡB（T3，No，Mx）	7	N	Y	N	exon 13 H520H
201012269	M	58	ⅡB（T2b，N1，Mx）	5.7	Y	Y	Y
201012458	M	48	ⅡA（T2b，No，cMo）	5	N	N	Y	intron 13
201014446	M	52	ⅡA（T1b，N1，cMo）	2.5	Y	N	N
201015045	M	75	T2a，No，cMo	2.5	N	N	N
201015856	M	70	ⅠB（T2a，No，cMo）	4.5	N	Y	N
201019545	M	60	ⅡA（T2，N1，cMo）	2.5	Y	N	N
200900511	M	61	ⅡB（T2，N1，Mx）	6	Y	Y	Y
200901800	M	58	IIB（T2b，N1，Mx）	6	Y	Y	Y
200902468	M	52	ⅡB（T2，N1，Mx）	3.2	Y	N	Y	intron 13
200902849	M	59	ⅢA（T2，N2，Mx）	5	Y	Y	N	intron 13
200903155	M	72	ⅡB（T2，N1，Mx）	5	Y	N	N
200903735	M	53	ⅠB（T2，No，Mx）	4.5	N	N	N
200904109	F	46	IB(T2，N0，Mx）	3	N	N	N
200904110	M	51	ⅡB（T3，No，Mx）	6	N	Y	Y	intron 13
200904944	M	67	ⅡB（T2，N1，Mx）	4	Y	Y	Y	intron 13
200905137	M	63	ⅢA（T2，N2，Mx）	4	Y	Y	N
200905992	M	73	ⅢA（pT3，N2，Mx）	10	Y	Y	Y
200906359	M	48	ⅡB（T2，N1，Mx）	4	Y	Y	N	intron 13
200906954	M	71	ⅠA（T1，No，Mx）	1.5	N	N	N
200907222	M	60	ⅠA（T1，No，Mx）	1.2	N	N	N	exon 13 G502G
200907281	M	65	ⅢA（T2，N2，Mx）	6	Y	Y	N	intron 13
200908138	M	63	ⅠA（T1，No，Mx）	2.5	N	N	N	intron 13
200908673	M	59	ⅢA（T3，N1，Mx）	8	Y	N	Y
200908842	M	67	ⅠB（T2，No，Mx）	3	N	Y	N	exon 5 S131C
200908865	M	61	ⅠB（T2，No，Mx）	4	N	Y	N
200910168	M	57	ⅠB（T2，No，Mx）	3.5	N	N	N
200910481	M	73	ⅠA（T1，No，Mx）	1.2	N	N	N	intron 13
200910504	M	67	ⅠA（T1，No，Mx）	1.5	N	N	N	intron 13
200911003	F	45	ⅢA（T3，N1，Mx）	9	Y	N	Y
200911491	M	77	ⅠA（T1，No，Mx）	2.8	N	Y	Y
200912646	M	66	ⅠB（pT2，No，Mx）	6.5	N	Y	N
200912894	M	55	ⅢA（T2，N2，Mx）	4	Y	Y	N
200913390	M	51	ⅠB（T2，No，Mx）	4	N	N	Y
200913872	M	63	ⅠB（T2，No，Mx）	3.5	N	Y	N
200913963	M	67	ⅡB（T2，N1，Mx）	4	Y	Y	N	intron 13
200914682	M	60	ⅠA（T1，No，Mx）	2.5	N	N	N	exon 5 L100L
200914683	M	61	ⅠB（T2，No，Mx）	6	N	Y	Y	intron 13
200915183	M	62	ⅡB（T2，N1，Mx）	6	Y	N	N	exon 5 L100L
200915351	M	67	ⅠA（T1，No，Mx）	1.5	N	N	N
200916767	M	60	ⅢA（T4，N1，Mx）	4.5	Y	Y	Y
200918687	F	72	ⅢA（T2，N2，Mx）	5.2	Y	Y	Y
200918741	M	66	ⅠB（pT2，No，Mx）	1.8	N	Y	N	intron 13
200918913	M	68	ⅢA（T2，N2，Mx）	4	Y	N	N	intron 13
200801002	M	52	ⅡB（T2，N1，Mx）	6	Y	Y	Y	intron 13
200805897	M	51	ⅢA（T2，N2，Mx）	4	Y	Y	Y
200808453	M	74	ⅢA（T2，N2，Mx）	6	Y	Y	Y	exon 15 T681I
200810320	M	75	ⅠA（T1，No，Mx）	1.5	N	N	N
200810632	M	69	ⅢA（T3，N1，Mx）	8	Y	N	Y
200813329	M	60	ⅡB（T2，N1，Mx）	5	Y	N	N
200814764	M	45	ⅡB（T2，N1，Mx）	4	Y	N	N
200816202	F	71	ⅠB（T2，No，Mx）	3.2	N	Y	N
200818041	M	77	ⅡB（pT2，N1，Mx）	3.8	Y	N	N
200818367	M	68	ⅢB（T4，N2，Mx）	9	Y	Y	N	intron 13
200819251	M	56	ⅠB（T2，No，Mx）	4.5	N	N	N
